# Supplementary material for: Effects of different levels of methionine on sow health and plasma metabolomics during late gestation
Source: Royal Society of Chemistry journal article supplement (doi:10.1039/c8fo01477a), 2018-01-01
Supplement: c8fo01477a1.pdf [file c8fo01477a1.pdf]

Table S1: Gradient elution program of mobile phase

| Total time (min) | A (water with 0.1% formic acid)% | B (acetonitrile)% |
|------------------|----------------------------------|-------------------|
| 0                | 98                               | 2                 |
| 20               | 0                                | 100               |
| 13               | 98                               | 2                 |
| 15               | 98                               | 2                 |
