# Supplementary material for: Effects of different levels of methionine on sow health and plasma metabolomics during late gestation
Source: Royal Society of Chemistry journal article supplement (doi:10.1039/c8fo01477a), 2018-01-01
Supplement: c8fo01477a3.pdf [file c8fo01477a3.pdf]

Table S3: The information of metabolites reference standards

| Name                                         | Formula                                                     | Chemical structure                                                                   | Mass   | Rt (min) | Source                                                                                          |
|----------------------------------------------|-------------------------------------------------------------|--------------------------------------------------------------------------------------|--------|----------|-------------------------------------------------------------------------------------------------|
| 2-Pyrrolidinone                              | C <sub>4</sub> H <sub>7</sub> NO                            | 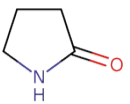    | 86.06  | 4.85     | <a href="http://www.hmdb.ca/metabolites/HMDB02039">http://www.hmdb.ca/metabolites/HMDB02039</a> |
| L-3-Aminodihydro-2(3H)-furanone              | C <sub>4</sub> H <sub>7</sub> NO <sub>2</sub>               |     | 102.03 | 5.85     | <a href="http://www.hmdb.ca/metabolites/HMDB29387">http://www.hmdb.ca/metabolites/HMDB29387</a> |
| Hypotaurine                                  | C <sub>2</sub> H <sub>7</sub> NO <sub>2</sub> S             |    | 110.02 | 5.02     | <a href="http://www.hmdb.ca/metabolites/HMDB00965">http://www.hmdb.ca/metabolites/HMDB00965</a> |
| Trimethylpyrazine                            | C <sub>7</sub> H <sub>10</sub> N <sub>2</sub>               |    | 123.04 | 5.85     | <a href="http://www.hmdb.ca/metabolites/HMDB31844">http://www.hmdb.ca/metabolites/HMDB31844</a> |
| Nicotinic acid                               | C <sub>6</sub> H <sub>5</sub> NO <sub>2</sub>               |   | 124.04 | 4.70     | <a href="http://www.hmdb.ca/metabolites/HMDB01488">http://www.hmdb.ca/metabolites/HMDB01488</a> |
| (S)-2,3,4,5-tetrahydropyridine-2-carboxylate | C <sub>6</sub> H <sub>9</sub> NO <sub>2</sub>               |   | 128.12 | 11.03    | <a href="http://www.hmdb.ca/metabolites/HMDB59657">http://www.hmdb.ca/metabolites/HMDB59657</a> |
| Pyroglutamic acid                            | C <sub>5</sub> H <sub>7</sub> NO <sub>3</sub>               |   | 130.01 | 7.00     | <a href="http://www.hmdb.ca/metabolites/HMDB00267">http://www.hmdb.ca/metabolites/HMDB00267</a> |
| 5-Hydroxyindole                              | C <sub>8</sub> H <sub>7</sub> NO                            |   | 134.06 | 2.46     | <a href="http://www.hmdb.ca/metabolites/HMDB59805">http://www.hmdb.ca/metabolites/HMDB59805</a> |
| Tyramine                                     | C <sub>8</sub> H <sub>11</sub> NO                           |   | 138.09 | 5.50     | <a href="http://www.hmdb.ca/metabolites/HMDB00306">http://www.hmdb.ca/metabolites/HMDB00306</a> |
| L-Histidine                                  | C <sub>6</sub> H <sub>9</sub> N <sub>3</sub> O <sub>2</sub> |   | 156.14 | 4.91     | <a href="http://www.hmdb.ca/metabolites/HMDB00177">http://www.hmdb.ca/metabolites/HMDB00177</a> |
| Tiglylglycine                                | C <sub>7</sub> H <sub>11</sub> NO <sub>3</sub>              |  | 158.00 | 7.01     | <a href="http://www.hmdb.ca/metabolites/HMDB00959">http://www.hmdb.ca/metabolites/HMDB00959</a> |

|                         |                   |                                                                                      |        |       |                                                                                                 |
|-------------------------|-------------------|--------------------------------------------------------------------------------------|--------|-------|-------------------------------------------------------------------------------------------------|
| 3-Methylcrotonylglycine | $C_7H_{11}NO_3$   | 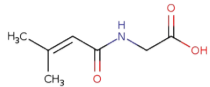   | 158.15 | 10.07 | <a href="http://www.hmdb.ca/metabolites/HMDB00459">http://www.hmdb.ca/metabolites/HMDB00459</a> |
| Glycyl-Serine           | $C_5H_{10}N_2O_4$ |    | 163.12 | 6.23  | <a href="http://www.hmdb.ca/metabolites/HMDB28850">http://www.hmdb.ca/metabolites/HMDB28850</a> |
| Acetylcysteine          | $C_5H_9NO_3S$     |    | 64.06  | 8.59  | <a href="http://www.hmdb.ca/metabolites/HMDB01890">http://www.hmdb.ca/metabolites/HMDB01890</a> |
| 1-Methylhistidine       | $C_7H_{11}N_3O_2$ |   | 170.09 | 1.32  | <a href="http://www.hmdb.ca/metabolites/HMDB00001">http://www.hmdb.ca/metabolites/HMDB00001</a> |
| Alanyl-Histidine        | $C_9H_{14}N_4O_3$ |  | 227.18 | 6.16  | <a href="http://www.hmdb.ca/metabolites/HMDB28689">http://www.hmdb.ca/metabolites/HMDB28689</a> |

---
